# Supplementary material for: Hospital Outcomes among COVID-19 Hospitalizations with Acute Ischemic Stroke: Cross-Sectional Study Results from California State Inpatient Database
Source: MDPI journal article supplement (doi:10.3390/brainsci12091177), 2022-09-01
Supplement: s1 [file s1]

**Table S1.** ICD-10 codes.

| <b>Variables</b>                        | <b>ICD-10 codes</b>                    |
|-----------------------------------------|----------------------------------------|
| AIS                                     | I63, I65, and I66                      |
| Cerebral edema                          | G935 and G93.6                         |
| Deep venous thrombosis                  | I82                                    |
| Pulmonary embolism                      | I26                                    |
| Intracerebral hemorrhage                | I61 and I629                           |
| Systemic inflammatory response syndrome | R651                                   |
| Septic shock                            | A41 and R6521                          |
| Mechanical ventilation                  | 5A1945Z, 5A1955Z, 0BH17EZ, and 0BH18EZ |
| Respiratory failure                     | J96                                    |
